# Supplementary material for: An anionic metal–organic framework and its r-graphene oxide composite for selective adsorption and separation of methyl blue from aqueous solution
Source: Royal Society of Chemistry journal article supplement (doi:10.1039/d4dt03471f), 2025-01-01
Supplement: d4dt03471f1.pdf [file d4dt03471f1.pdf]

## Supporting Information

### Contents

Figure S1: PXRD of **Mn-FM**; simulated (black) and experimental (red)

Figure S2: Absorption spectra of (a) methyl orange and (b) methylene blue in presence of **Mn-FM** adsorbent

Figure S3: Absorption spectra of Rhodamine B (RhB) in presence of **Mn-FM** adsorbent

Figure S4: PXRD of **Mn-FM** (red line) and **d-Mn-FM** (green line)

Figure S5: XPS patterns of (a) **Mn-FM** and (b) **d-Mn-FM** MOFs

Figure S6: MO (15 ppm in methanol) adsorption spectra for **d-Mn-FM** (20 mg)

Figure S7: PXRD spectra of **rGO@Mn-FM** composite after treatment with water

Figure S8: SEM image of (a) **Mn-FM** and (b) **rGO@Mn-FM** composite

Figure S9: Nitrogen adsorption-desorption isotherm of **Mn-FM** (brown line) and **rGO@Mn-FM** (black line)

Figure S10: Absorption spectra of 1 ppm aqueous MeB solution in presence of **rGO@Mn-FM** adsorbent

Figure S11: Absorption spectra for dye mixture (MeB/MO) in presence of **rGO@Mn-FM**

Kinetic equations for the adsorption of dye

Isotherm models for the adsorption of dye

Table S1: List of dye removal rate of some of the reported MOFs

Table S2: Water characterisations table

Table S3: Crystallographic table

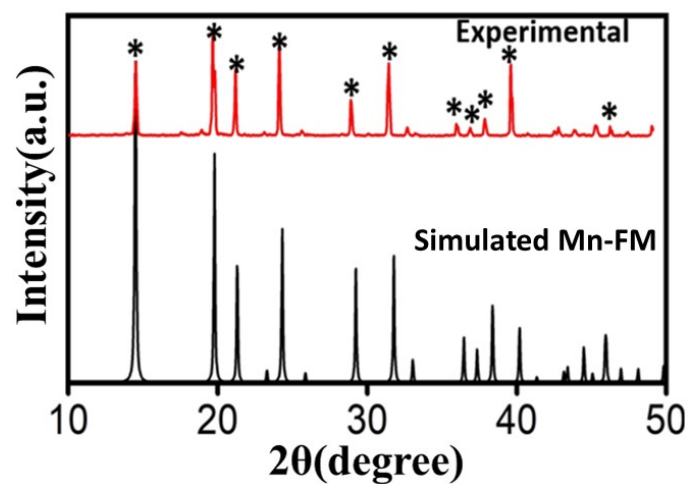

Fig S1: PXRD of Mn-FM; simulated (black) and experimental (red).

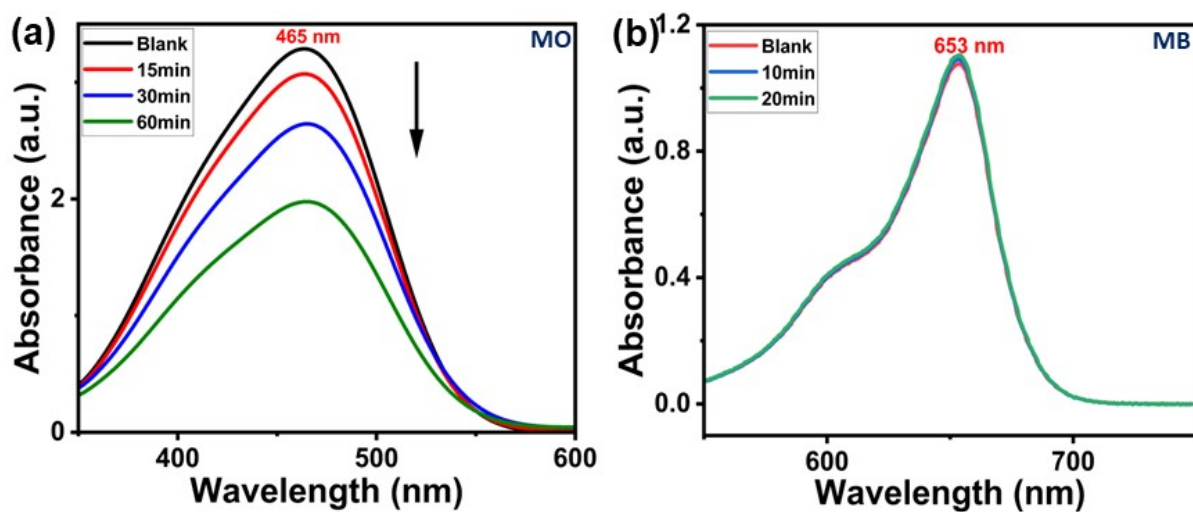

Fig S2: Absorption spectra of (a) methyl orange (MO) and (b) methylene blue (MB) in presence of Mn-FM adsorbent.

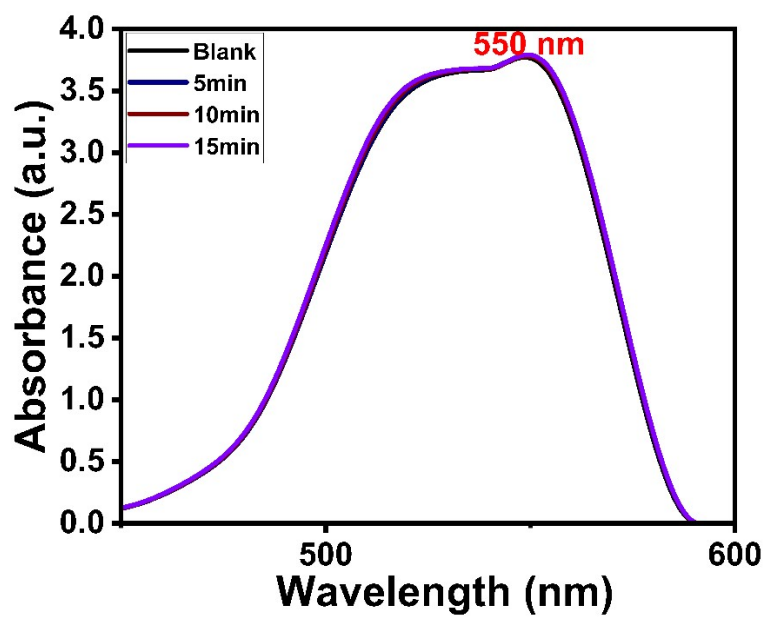

Fig S3: Absorption spectra of Rhodamine B (RhB) in presence of Mn-FM adsorbent.

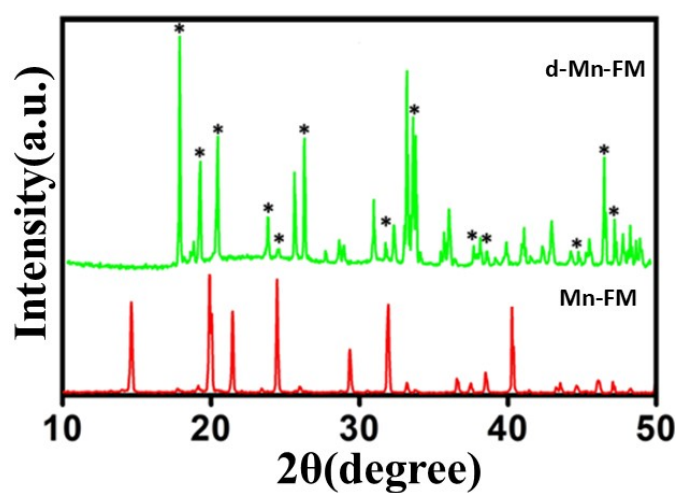

Fig S4: PXRD of Mn-FM (red line) and d-Mn-FM (green line).

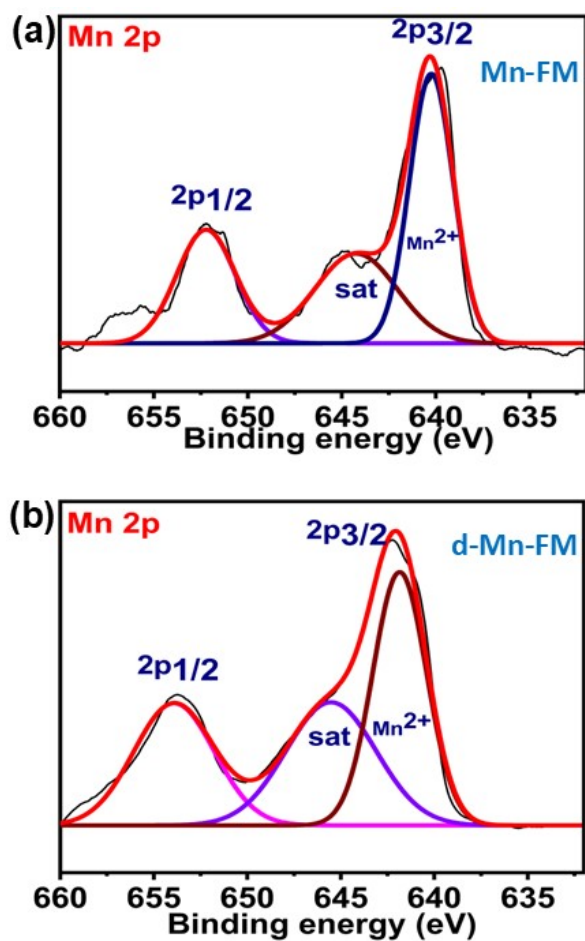

Fig S5: XPS patterns of (a) Mn-FM and (b) d-Mn-FM MOFs.

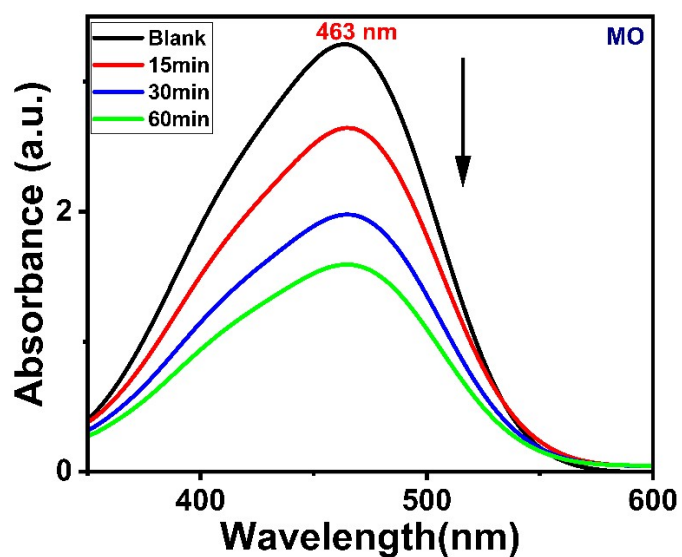

Fig S6: MO (15 ppm in methanol) adsorption spectra for d-Mn-FM (20 mg).

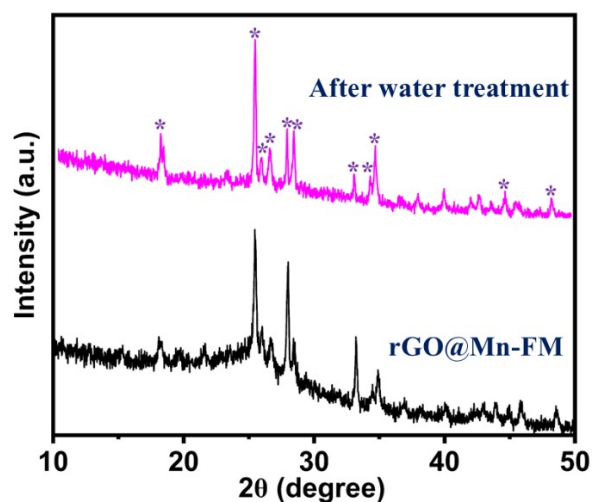

Fig S7: PXRD spectra of **rGO@Mn-FM** composite after treatment with water.

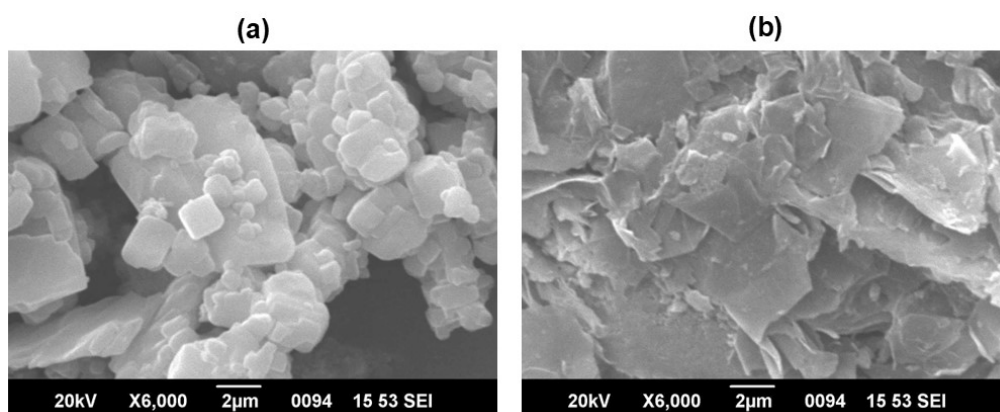

Fig S8: SEM image of (a) **Mn-FM** and (b) **rGO@Mn-FM** composite.

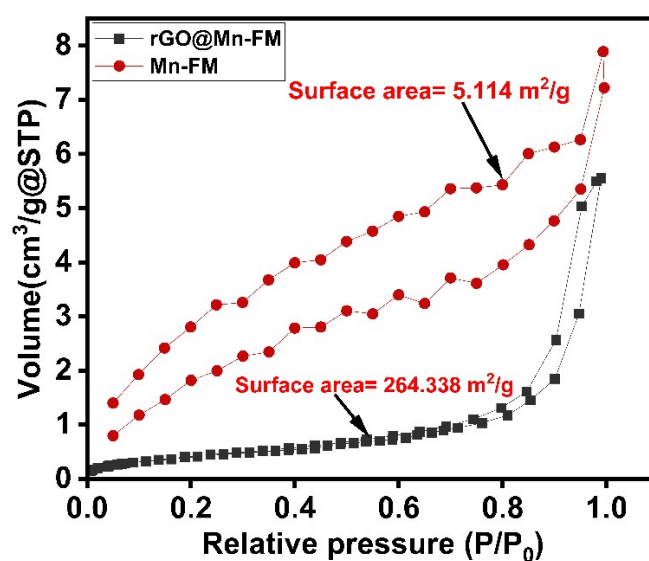

Fig S9: Nitrogen adsorption-desorption isotherm of **Mn-FM** (brown line) and **rGO@Mn-FM** (black line).

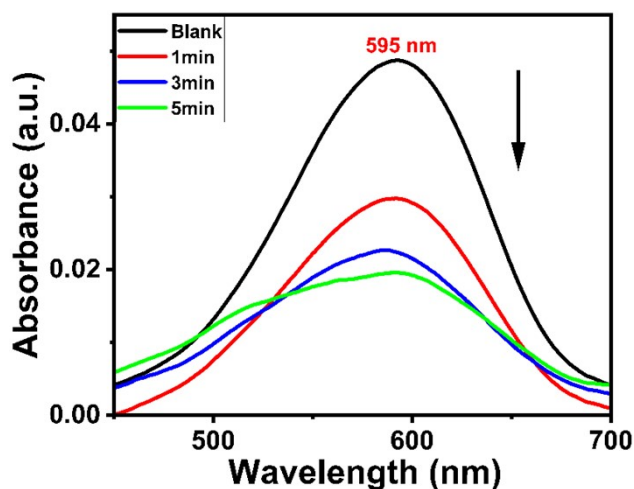

Fig S10: Absorption spectra of 1 ppm aqueous MeB solution in presence of **rGO@Mn-FM** adsorbent.

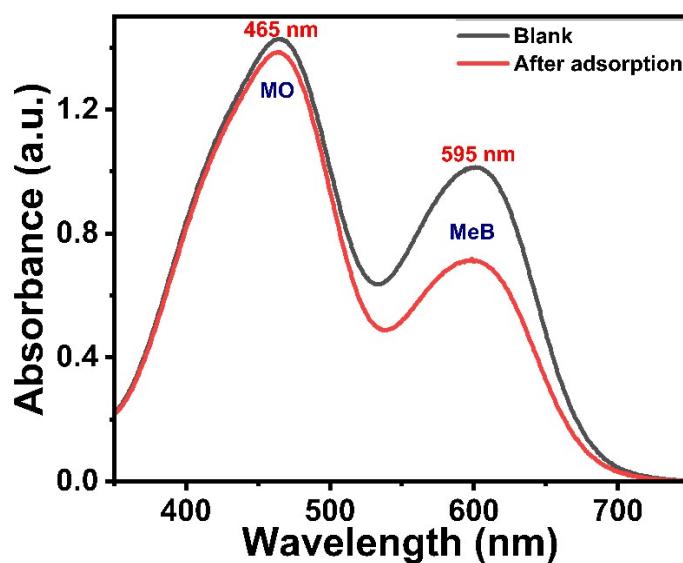

Fig S11: Absorption spectra for dye mixture (MeB/MO) in presence of **rGO@Mn-FM**.

### Kinetic equation for the adsorption of dye

The pseudo-first-order (PFO) kinetic model equation is

$$\log(q_e - q_t) = \log q_e - k_1 t / 2.303$$

where  $k_1$  ( $\text{min}^{-1}$ ) is the rate constant of the pseudo-first-order reaction,  $q_e$  is the adsorption capacity ( $\text{mg/g}$ ) at equilibrium,  $q_t$  is the adsorption capacity ( $\text{mg/g}$ ) at time ( $\text{min}$ ).<sup>14</sup>

The Pseudo-second order (PSO) kinetic model equation is as follows

$$t/q_t = 1/(k_2 q_e^2) + t/q_e$$

Where,  $k_2$  (g/mg min<sup>-1</sup>) is the rate constant for pseudo-second-order kinetic model.

## **Isotherm models for the adsorption of dye**

### **Langmuir isotherm model**

Langmuir model is described by the following equation;

$$\frac{C_e}{q_e} = \frac{1}{q_m \cdot K_L} + \frac{C_e}{q_m}$$

Where,  $q_m$  denotes the maximum amount of dye adsorbed per unit mass of adsorbent,  $q_e$  denotes the amount of dye per unit mass of adsorbent at equilibrium (mg/g).  $K_L$  denotes the Langmuir constant and  $C_e$  denotes the equilibrium concentration of adsorbate in solution (mg/L).

Dimensionless constant ( $R_L$ ) is calculated by using the following equation:

$$R_L = 1/(1 + K_L C_o)$$

$R_L$  factor is used to determine the favorability of dye adsorption onto adsorbent surface. For linear favorable adsorption ( $0 < R_L < 1$ ), unfavorable ( $R_L > 1$ ), linear ( $R_L = 1$ ) and irreversible ( $R_L = 0$ ).<sup>15</sup>

### **Freundlich isotherm model**

The Freundlich isotherm model is represented by the equation:

$$\ln q_e = \ln K_F + \left(\frac{1}{n_F}\right) \ln C_e$$

where,  $K_F$  and  $n_F$  are Freundlich isotherm constant;  $K_F$  describes adsorption extent and  $n_F$  is heterogeneity factor. The  $K_F$  and  $n_F$  values are calculated by equations:

$$\text{Intercept} = \ln K_F \quad n_F = 1/\text{slope}$$

If  $n_F > 1$ , then favorable adsorption, if  $n_F < 1$  then chemisorption and  $n_F = 1$  then linear adsorption.<sup>16</sup>

Table S1: List of dye removal rate of some of the reported MOFs

| Dye                 | MOFs/ Composites                                                     | Removal rate | Time (minute) | Ref. |
|---------------------|----------------------------------------------------------------------|--------------|---------------|------|
| Methylene blue      | Fe <sub>3</sub> O <sub>4</sub> @MIL-100(Fe)                          | 73.8         | 420           | 1    |
|                     | MIL-100(Fe)                                                          | 27           | 30            | 2    |
|                     | USTC-1                                                               | 26.6         | 240           | 3    |
|                     | CuBDC                                                                | 41.01        | 20            | 4    |
| Methyl orange       | UiO-66                                                               | 83.7         | 120           | 5    |
|                     | H <sub>6</sub> P <sub>2</sub> W <sub>18</sub> O <sub>62</sub> /MOF-5 | 10           | 10            | 6    |
| Rhodamine B         | MIL-125(Ti)                                                          | 59.92        | 180           | 7    |
|                     | Zn-MOF                                                               | 3.75         | 60            | 8    |
|                     | H <sub>6</sub> P <sub>2</sub> W <sub>18</sub> O <sub>62</sub> /MOF-5 | 68           | 10            | 9    |
|                     | MIL-68(In)-NH <sub>2</sub>                                           | 50           | 60            | 10   |
| Reactive black 5    | MIL-125(Ti)                                                          | 60           | 180           | 11   |
| Acid blue 92        | UiO-66                                                               | 73           | 40            | 12   |
| Direct red 2B       | UiO-66                                                               | 76           | 40            | 12   |
| Maxilon blue<br>M2G | UiO-66                                                               | 46.6         | 40            | 12   |
| Orange G            | POM@UiO-66                                                           | 40           | 120           | 13   |

Table S2: Water characterisations table

| Water Properties | Distilled water  | Pond water        |
|------------------|------------------|-------------------|
| Alkalinity       | <b>31.2 mg/L</b> | <b>215.2 mg/L</b> |
| Hardness         | <b>9.7 mg/L</b>  | <b>41 mg/L</b>    |
| TDS              | <b>2 ppm</b>     | <b>164 ppm</b>    |
| Turbidity        | <b>0 NTU</b>     | <b>25 NTU</b>     |

Table S3: Crystallographic table

| Compound No. | Mn-FM                                                                          |
|--------------|--------------------------------------------------------------------------------|
| Formulae     | C <sub>15</sub> H <sub>15</sub> Mn <sub>3</sub> N <sub>9</sub> O <sub>18</sub> |



|                                |                                              |
|--------------------------------|----------------------------------------------|
| Mol. wt.                       | 774.18                                       |
| CCDC No                        | 2263898                                      |
| Crystal system                 | Trigonal                                     |
| Space group                    | <i>R-3c</i>                                  |
| Temperature (K)                | 298 (2)                                      |
| Wavelength (Å)                 | 0.71073                                      |
| <i>a</i> (Å)                   | 8.3840(16)                                   |
| <i>b</i> (Å)                   | 8.3840(16)                                   |
| <i>c</i> (Å)                   | 23.021(6)                                    |
| $\alpha$ (°)                   | 90.00                                        |
| $\beta$ (°)                    | 90.00                                        |
| $\gamma$ (°)                   | 120.00                                       |
| <i>V</i> (Å <sup>3</sup> )     | 1295.50(17)                                  |
| <i>Z</i>                       | 2                                            |
| Density/gcm <sup>-3</sup>      | 1.897                                        |
| Abs. Coeff. /mm <sup>-1</sup>  | 1.428                                        |
| Abs. correction                | none                                         |
| F(000)                         | 768                                          |
| Total no. of reflections       | 279                                          |
| Reflections, $I > 2\sigma(I)$  | 277                                          |
| Max. $2\theta$ (°)             | 25.24                                        |
| Ranges (h, k, l)               | -10 ≤ h ≤ 10<br>-10 ≤ k ≤ 10<br>-27 ≤ l ≤ 27 |
| Completeness to $2\theta$ (%)  | 0.976                                        |
| Data/ Restraints / Parameters  | 279/0/ 28                                    |
| Goof ( $F^2$ )                 | 1.262                                        |
| R indices [ $I > 2\sigma(I)$ ] | 0.0729                                       |
| R indices (all data)           | 0.0730                                       |

## References

1. Y. Shao, L. Zhou, C. Bao, J. Ma, M. Liu and F. Wang, *Chem. Eng. J.*, 2016, **283**, 1127-1136.
2. H. Lv, H. Zhao, T. Cao, L. Qian, Y. Wang and G. Zhao, *J. Mol. Catal. Chem.*, 2015, **400**, 81-89.
3. B. Li, W. Jiang, Y. Xu, Z. Xu, Q. Yan and G. Yong, *Dyes Pigments.*, 2020, **174**, 108017.
4. V. D. Doan, T. L. Do, T. M. T. Ho, V. T. Le and H. T. Nguyen, *Separ. Sci. Technol.*, 2020, **55**, 444-455.
5. H. Molavi, A. Hakimian, A. Shojaei and M. Raeiszadeh, *Appl. Surf. Sci.*, 2018, **445**, 424-436.
6. X. Liu, W. Gong, J. Luo, C. Zou and Y. Yang, S. *Appl. Surf. Sci.*, 2016, **362**, 517-524.
7. H. Guo, F. Lin, J. Chen, F. Li and W. Weng, *Appl. Organomet. Chem.*, 2015, **29**, 12-19.
8. J. Zhang, F. Li and Q. Sun, *Appl. Surf. Sci. J.*, 2018, **440**, 1219–1226.
9. X. Liu, W. Gong, J. Luo, C. Zou, Y. Yang and S. Yang, *Appl. Surf. Sci.*, 2016, **362**, 517-524.
10. C. Yang, S. Wu, J. Cheng and Y. Chen, *J. Alloys Compd.*, 2016, **687**, 804-812.
11. M. Hasanzadeh, A. Simchi, H.S. Far, *Mater. Chem. Phys.*, 2019, **233**, 267-275.
12. M. Oveisi, M. Alinia Asli and N.M. Mahmoodi, *Inorg. Chim. Acta.*, 2019, **487**, 169-176.
13. L. Zeng, L. Xiao, Y. Long and X. Shi, *J. Colloid Interface Sci.*, 2018, **516**, 274-283.
14. C. Arora, S. Soni, S. Sahu, J. Mittal, P. Kumar and P. Bajpai, *J. Mol. Liq.*, 2019, **284**, 343-352.
15. J. Wang and X. Guo, *Chemosphere*, 2020, **258**, 127279.
16. M. Korkmaz, C. Ozmetin, B. Fil, E. Ozmetin and Y. Yasar, *Fresenius Environ. Bull.*, 2013, **22**, 1524-1533.
